# Supplementary material
Source: Springer Nature journal article supplement (https://www.springermedizin.de/resource/supplementary/12888_2012_1188_MOESM3_ESM.pdf/9480258)

Funnel plot

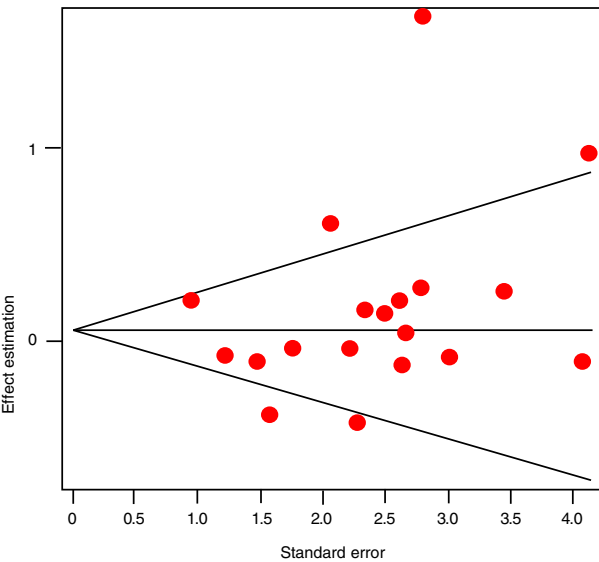

A

Funnel plot

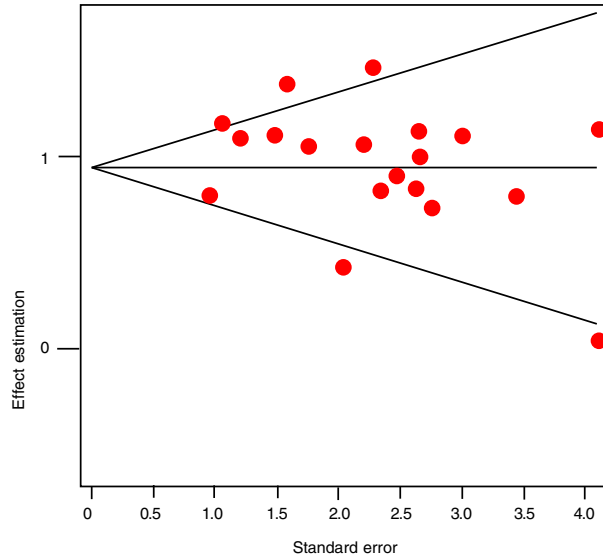

B

Funnel plot

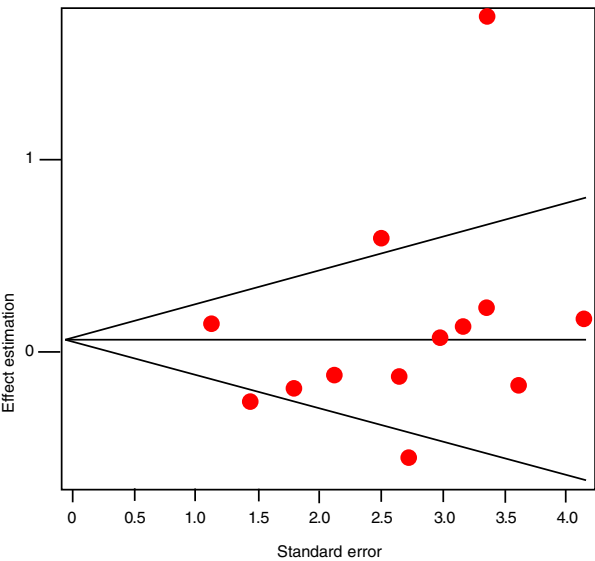

C

Funnel plot

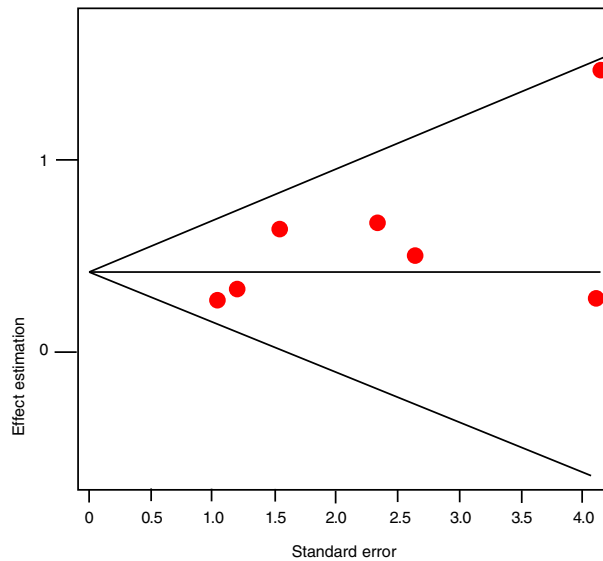

D

Supplement: MOESM3 [file 9480258]
